# Supplementary material for: Human milk oligosaccharide 2′-fucosyllactose supplementation improves gut barrier function and signaling in the vagal afferent pathway in mice
Source: PubMed Central journal article supplement — Food Funct. 2021 Jul 26;12(18):8507–21. doi: 10.1039/d1fo00658d (PMC8451585; doi:10.1039/d1fo00658d), 2021-07-26
Supplement: FO-012-D1FO00658D-s002.pdf [file FO-012-D1FO00658D-s002.pdf]

**Table S1.** Diet Composition

|                     | <b>LF/CON</b> |             | <b>LF/2'-FL</b> |             | <b>HF/CON</b> |             | <b>HF/2'-FL</b> |             |
|---------------------|---------------|-------------|-----------------|-------------|---------------|-------------|-----------------|-------------|
|                     | gm            | kcal        | gm              | kcal        | gm            | kcal        | gm              | kcal        |
| Protein             | 19.5          | 20.0        | 17.6            | 20.0        | 24.4          | 20.0        | 22.0            | 20.0        |
| Carbohydrate        | 73.3          | 70.0        | 76.0            | 70.0        | 47.7          | 35.0        | 52.9            | 35.0        |
| Fat                 | 4.3           | 10.0        | 3.9             | 10.0        | 24.4          | 45.0        | 22.0            | 45.0        |
| Total               |               | 100.0       |                 | 100.0       |               | 100.0       |                 | 100.0       |
| <b>kcal/gm</b>      | <b>3.90</b>   |             | <b>3.51</b>     |             | <b>4.88</b>   |             | <b>4.39</b>     |             |
| <b>Ingredient</b>   | <b>gm</b>     | <b>kcal</b> | <b>gm</b>       | <b>kcal</b> | <b>gm</b>     | <b>kcal</b> | <b>gm</b>       | <b>kcal</b> |
| Casein              | 207           | 826         | 207             | 826         | 207           | 826         | 207             | 826         |
| L-Cystine           | 3             | 12          | 3               | 12          | 3             | 12          | 3               | 12          |
| Corn Starch         | 535           | 2141        | 535             | 2141        | 64            | 255         | 64              | 255         |
| Maltodextrin 10     | 125           | 500         | 125             | 500         | 125           | 500         | 125             | 500         |
| Sucrose             | 56            | 223         | 56              | 223         | 161           | 642         | 161             | 642         |
| 2'-fucosyllactose   | 0             | 0           | 119.3           | 0           | 0             | 0           | 95.4            | 0           |
| Cellulose           | 53.7          | 0           | 53.7            | 0           | 43.0          | 0           | 43.0            | 0           |
| Soybean Oil         | 25            | 225         | 25              | 225         | 25            | 225         | 25              | 225         |
| Lard                | 22            | 194         | 22              | 194         | 185           | 1661        | 185             | 1661        |
| AIN-93G Mineral Mix | 35            | 30.9        | 35              | 30.9        | 35            | 30.9        | 35              | 30.9        |
| AIN-93 Vitamin Mix  | 10            | 39.2        | 10              | 39.2        | 10            | 39.2        | 10              | 39.2        |
| Choline Bitartrate  | 2.5           | 0           | 2.5             | 0           | 2.5           | 0           | 2.5             | 0           |
| TBHQ, antioxidant   | 0.014         | 0           | 0.014           | 0           | 0.014         | 0           | 0.014           | 0           |
| FD&C Yellow Dye #5  | 0.04          | 0           | 0               | 0           | 0             | 0           | 0.025           | 0           |
| FD&C Red Dye #40    | 0             | 0           | 0               | 0           | 0.05          | 0           | 0.025           | 0           |
| FD&C Blue Dye #1    | 0.01          | 0           | 0.04            | 0           | 0             | 0           | 0               | 0           |
| <b>Total</b>        | <b>1073</b>   | <b>4192</b> | <b>1193</b>     | <b>4192</b> | <b>859</b>    | <b>4192</b> | <b>954</b>      | <b>4192</b> |
| % Sucrose           | 9.4           | <b>7.0</b>  | 8.5             | 7.0         | 23.9          | 17.0        | 21.5            | 17.0        |
| % Cellulose         | 5.0           | <b>0.0</b>  | 4.5             | 0.0         | 5.0           | 0.0         | 4.5             | 0.0         |

HF, high fat; HF/CON, HF without 2'-FL; HF/2'-FL, HF with 2'-FL (w/w) in diet; LF, low fat; LF/CON, LF without 2'-FL; LF/2'-FL, LF with 2'-FL (w/w) in diet; 2'-FL, 2-fucosyllactose.

**Table S2.** Primer Sequences used for RT-PCR

| <b>Gene</b>   | <b>Accession no.</b> | <b>Forward primers (5' to 3')</b> | <b>Reverse primers (5' to 3')</b> |
|---------------|----------------------|-----------------------------------|-----------------------------------|
| ACC-2         | NM_133904            | CGC TCA CCA ACA GTA AGG TGG       | GCT TGG CAG GGA GTT CCT C         |
| CD36          | NM_007643            | CGC TTT CTG CGT ATC GTC TG        | GAT GCA CGG GAT CGT GTC T         |
| CLDN-2        | NM_016675.4          | GGC TGT TAG GCT CAT CCA T         | TGG CAC CAA CAT AGG AAC TC        |
| CLDN-3        | NM_009902.4          | AAG CCG AAT GGA CAA AGA A         | CTG GCA AGT AGC TGC AGT G         |
| CLDN-7        | NM_016887.6          | AGG GTC TGC TCT GGT CCT T         | GTA CGC AGC TTT GCT TTC A         |
| CLDN-15       | NM_021719.4          | GCT TCT TCA TGT CAG CCC TG        | TTC TTG GAG AGA TCC ATG T         |
| Col1a2        | NM_007917            | GGC AGG TCT GGG CTT TAT TA        | GCT GAG CAT GTC TAC CAC TT        |
| Eif4e         | NM_031189.2          | GTG TGT GGA GCT GTT GTT AAT G     | CGC TCT TTG TAG CTG TGT CT        |
| FABP4         | NM_011989.5          | AAG GTG AAG AGC ATC ATA ACC CT    | TCA CGC CTT TCA TAA CAC ATT CC    |
| FOXO1         | NM_019739.3          | GGAAGCCCTGAAACCTAACA              | CCAGCTGAAACCACAGAGAA              |
| FOXO3         | NM_019740.3          | GCA GAC CAG CTC ACA AGA TAA       | CTG GTG CCT GAA ACC TAA CA        |
| GAPDH         | NM_008084.3          | ACG GTC AGG TCA TCA CTA TC        | GAT GCC ACA GGA TTC CAT AC        |
| Igf1          | NM_010512.5          | GGG ATG CCA CCA CAA TAT C         | CTT TCT CCT CTC TCC CTT CT        |
| IL-1 $\beta$  | NM_008361.4          | ACA GAT CGG CTC CTA CTT           | CGG GTC TGC TCA TAG TAA TG        |
| IL-22         | NM_016971.2          | GGA CCT GCT GTT TAT GTC T         | TTC AAC TGA GCC AGG TTT C         |
| JAM-A         | NM_172647.2          | CTG ATC TTT GAC CCC GTG AC        | ACC AGA CGC CAA AAA TCA AG        |
| Klf15         | NM_023184.4          | GCA GTG GAG GTA TTG GAG ATA G     | CTC AGC CTC CAT GTT CTC TT        |
| MCP-1         | NM_011333.3          | CGA TGT CTA AGA GAG AAA GGG       | GGA AAC AGG TAC CCA CAA A         |
| MuRF-1        | NM_001039048.2       | TGCCAAGCAGCTCATCAA                | CAGCCTCCTTCTGTAAACTC              |
| Myod1         | NM_010866.2          | CGG AGT GGC AGA AAG TTA AG        | CGA AAC ACG GGT CAT CAT AG        |
| PPAR $\gamma$ | NM_011146.3          | GAG CAT CTC CCT CAC AAT TC        | GGG TGC AGC GAA CTT TAT           |
| Reg3 $\gamma$ | NM_011260.2          | CAC TCC AGC TGT TGG AAG TTT A     | GCT CTG ACA CAG TAC CCT CC        |
| SREBP-1c      | NM_016971.2          | GCA GCC ACC ATC TAG CCT G         | CAG CAG TGA GTC TGC CTT GAT       |
| TNF $\alpha$  | NM_013693.3          | TCT ACT CCC AGG TTC TCT TC        | GCT GAC TTT CTC CTG GTA TG        |
| ZO-1          | NM_001163574.1       | GCC GCT AAG AGC ACA GCA A         | TCC CCA CTC TGA AAA TGA GGA       |
| ZO-3          | NM_013769.3          | ATC CGA GGA CCT TGA CCT GAC GG    | GTC GCT GTT GGT CCG ACT GTC AC    |

ACC-2, acetyl-CoA carboxylase 2; CD36, cluster of differentiation 36; CLDN, claudin; COL1A1, collagen Type I Alpha 1; Eif4e, eukaryotic translation initiation factor 4E; FABP4, fatty acid binding protein 4; FOXO, Forkhead box protein O; GAPDH, glyceraldehyde 3-phosphate dehydrogenase; Igf1, insulin-like growth factor 1; IL, interleukin; JAM-A, junctional adhesion molecule-A; Klf15, Kruppel Like Factor 15; MCP-1, macrophage chemoattractant protein 1; MuRF-1, muscle RING-finger protein-1; Myod1, myoblast determination protein 1; PPAR $\gamma$ , peroxisome proliferator-activated receptor gamma; Reg3 $\gamma$ , regenerating islet-derived protein 3 gamma; SREBP-1c, sterol regulatory element-binding protein-1c; TNF $\alpha$ , tumor necrosis factor alpha; ZO, zonula occludens-1.

**Table S3.** Relative Gene Expression of Muscle Atrophy Function Genes

| Muscle | Gene   | LF/CON |       | LF/2'-FL |       | HF/CON |       | HF/2'-FL |       |
|--------|--------|--------|-------|----------|-------|--------|-------|----------|-------|
|        |        | RE     | SEM   | RE       | SEM   | RE     | SEM   | RE       | SEM   |
| Gastro | MuRF1  | 1.000  | 0.163 | 0.831    | 0.031 | 0.978  | 0.062 | 0.886    | 0.100 |
| Gastro | Igf1   | 1.000  | 0.083 | 1.015    | 0.081 | 1.335  | 0.127 | 1.084    | 0.077 |
| Gastro | Klf15  | 1.000  | 0.071 | 0.953    | 0.089 | 1.063  | 0.048 | 0.943    | 0.073 |
| Gastro | Foxo1  | 1.000  | 0.074 | 0.814    | 0.073 | 0.937  | 0.078 | 0.916    | 0.138 |
| Gastro | Foxo3  | 1.000  | 0.062 | 1.038    | 0.051 | 1.074  | 0.093 | 0.943    | 0.142 |
| Gastro | Eif4e  | 1.000  | 0.059 | 0.875    | 0.027 | 1.193  | 0.104 | 1.041    | 0.046 |
| Gastro | Colla1 | 1.000  | 0.130 | 1.376    | 0.186 | 1.665  | 0.336 | 1.295    | 0.215 |
| Gastro | Myod1  | 1.000  | 0.115 | 1.020    | 0.067 | 1.313  | 0.106 | 1.110    | 0.089 |
| Soleus | MuRF1  | 1.000  | 0.094 | 0.832    | 0.133 | 0.866  | 0.074 | 0.970    | 0.100 |
| Soleus | Igf1   | 1.000  | 0.106 | 0.944    | 0.060 | 1.207  | 0.118 | 1.155    | 0.119 |
| Soleus | Klf15  | 1.000  | 0.082 | 0.980    | 0.074 | 0.957  | 0.048 | 1.003    | 0.078 |
| Soleus | Foxo1  | 1.000  | 0.111 | 0.878    | 0.066 | 0.939  | 0.108 | 0.899    | 0.084 |
| Soleus | Foxo3  | 1.000  | 0.103 | 0.929    | 0.102 | 1.226  | 0.096 | 1.165    | 0.089 |
| Soleus | Eif4e  | 1.000  | 0.042 | 0.994    | 0.044 | 1.047  | 0.054 | 0.992    | 0.031 |
| Soleus | Colla1 | 1.000  | 0.238 | 1.014    | 0.102 | 1.305  | 0.247 | 1.287    | 0.122 |
| Soleus | Myod1  | 1.000  | 0.173 | 0.821    | 0.071 | 1.222  | 0.198 | 1.220    | 0.149 |
| TA     | MuRF1  | 1.000  | 0.082 | 0.767    | 0.081 | 0.863  | 0.046 | 0.766    | 0.043 |
| TA     | Igf1   | 1.000  | 0.115 | 1.146    | 0.049 | 1.167  | 0.112 | 1.191    | 0.100 |
| TA     | Klf15  | 1.000  | 0.063 | 0.839    | 0.077 | 0.828  | 0.036 | 0.800    | 0.044 |
| TA     | Foxo1  | 1.000  | 0.076 | 0.960    | 0.106 | 1.148  | 0.107 | 0.909    | 0.069 |
| TA     | Foxo3  | 1.000  | 0.059 | 0.855    | 0.037 | 1.010  | 0.055 | 0.886    | 0.061 |
| TA     | Eif4e  | 1.000  | 0.052 | 1.091    | 0.060 | 1.284  | 0.064 | 1.123    | 0.051 |
| TA     | Colla1 | 1.000  | 0.132 | 0.986    | 0.106 | 1.198  | 0.116 | 1.041    | 0.059 |
| TA     | Myod1  | 1.000  | 0.060 | 0.963    | 0.111 | 1.109  | 0.102 | 1.150    | 0.091 |

COL1A1, collagen Type I Alpha 1; Eif4e, eukaryotic translation initiation factor 4E; FOXO, Forkhead box protein O; Gastro, gastrocnemius; Igf1, insulin-like growth factor 1; Klf15, Kruppel Like Factor 15; MuRF-1, muscle RING-finger protein-1; Myod1, myoblast determination protein 1; RE, relative expression; SEM, standard error of mean; TA, tibialis anterior.

**Table S4.** Relative Gene Expression of Cecal Barrier Function Genes

| Gene     | RE    | SEM   | RE    | SEM   | RE    | SEM   | RE    | SEM   |
|----------|-------|-------|-------|-------|-------|-------|-------|-------|
| Reg3g    | 1.000 | 0.382 | 0.889 | 0.196 | 1.187 | 0.275 | 1.158 | 0.264 |
| Occludin | 1.000 | 0.090 | 1.056 | 0.149 | 0.887 | 0.064 | 0.908 | 0.067 |
| JAM-A    | 1.000 | 0.076 | 1.221 | 0.177 | 1.034 | 0.057 | 1.115 | 0.042 |
| ZO-1     | 1.000 | 0.094 | 1.224 | 0.231 | 0.921 | 0.119 | 1.253 | 0.121 |
| ZO-3     | 1.000 | 0.043 | 0.804 | 0.075 | 0.962 | 0.081 | 0.848 | 0.048 |
| CLDN-2   | 1.000 | 0.133 | 0.853 | 0.142 | 0.731 | 0.064 | 0.574 | 0.069 |
| CLDN-3   | 1.000 | 0.048 | 1.056 | 0.120 | 0.953 | 0.092 | 0.930 | 0.108 |
| CLDN-4   | 1.000 | 0.121 | 0.676 | 0.124 | 0.854 | 0.085 | 0.595 | 0.056 |
| CDLN-7   | 1.000 | 0.093 | 1.134 | 0.152 | 1.060 | 0.096 | 1.050 | 0.098 |
| CLDN-15  | 1.000 | 0.089 | 1.355 | 0.302 | 1.148 | 0.116 | 1.323 | 0.145 |
| IL-22    | 1.000 | 0.184 | 1.127 | 0.167 | 0.634 | 0.117 | 0.965 | 0.185 |

CLDN, claudin; IL-22, interleukin-22; JAM-A, junctional adhesion molecule-A; RE, relative expression; Reg3 $\gamma$ , regenerating islet-derived protein 3 gamma; SEM, standard error of mean; ZO, zonula occludens-1.

Table S5. Relative Gene Expression of Ileal Inflammatory Genes

| Gene          | LF/CON |       | LF/2'-FL |       | HF/CON |       | HF/2'-FL |       |
|---------------|--------|-------|----------|-------|--------|-------|----------|-------|
|               | RE     | SEM   | RE       | SEM   | RE     | SEM   | RE       | SEM   |
| IL-1 $\beta$  | 1.000  | 0.166 | 1.082    | 0.252 | 0.794  | 0.180 | 1.101    | 0.275 |
| IL-22         | 1.000  | 0.189 | 2.227    | 0.477 | 0.490  | 0.059 | 1.537    | 0.389 |
| TNF $\alpha$  | 1.000  | 0.292 | 1.124    | 0.130 | 1.071  | 0.243 | 1.156    | 0.170 |
| MCP-1         | 1.000  | 0.166 | 1.082    | 0.252 | 0.794  | 0.180 | 1.101    | 0.275 |
| Reg3 $\gamma$ | 1.000  | 0.233 | 2.504    | 0.313 | 3.427  | 0.431 | 2.657    | 0.365 |

*Significant Differences (One-Way ANOVA)*

| Reg3g              | Adj. p value |
|--------------------|--------------|
| LF/CON vs LF/2'-FL | 0.0166       |
| LF/CON vs HF/CON   | <0.0001      |
| HF/CON vs HF/2'-FL | 0.3188       |

HF, high fat; HF/CON, HF without 2'-FL; HF/2'-FL, HF with 2'-FL (w/w) in diet; Igf1, insulin-like growth factor 1; IL, interleukin; JAM-A; LF, low fat; LF/CON, LF without 2'-FL; LF/2'-FL, LF with 2'-FL (w/w) in diet; ; MCP-1, macrophage chemoattractant protein 1; RE, relative expression; Reg3 $\gamma$ , regenerating islet-derived protein 3 gamma; SEM, standard error of mean; TNF $\alpha$ , tumor necrosis factor alpha.

**Table S6.** Identification of 2'FL in plasma of mice fed low or high fat diet with or without 2' FL supplementation by using LC-QToF MS/MS.

| <b>Mouse ID</b> | <b>Diet</b>    | <b>Presence or absence of 2' FL</b> |
|-----------------|----------------|-------------------------------------|
| <b>3</b>        | Low Fat        | Absent                              |
| <b>14</b>       | Low Fat        | Absent                              |
| <b>17</b>       | Low Fat        | Absent                              |
| <b>20</b>       | Low Fat        | Absent                              |
| <b>26</b>       | Low Fat        | Absent                              |
| <b>32</b>       | Low Fat        | Absent                              |
| <b>33</b>       | Low Fat        | Absent                              |
| <b>41</b>       | Low Fat        | Absent                              |
| <b>8</b>        | Low Fat/2'-FL  | Present                             |
| <b>12</b>       | Low Fat/2'-FL  | Absent/Not identified               |
| <b>16</b>       | Low Fat/2'-FL  | Present                             |
| <b>29</b>       | Low Fat/2'-FL  | Present                             |
| <b>31</b>       | Low Fat/2'-FL  | Present                             |
| <b>34</b>       | Low Fat/2'-FL  | Partial identification              |
| <b>35</b>       | Low Fat/2'-FL  | Present                             |
| <b>2</b>        | High Fat       | Absent                              |
| <b>11</b>       | High Fat       | Absent                              |
| <b>21</b>       | High Fat       | Absent                              |
| <b>30</b>       | High Fat       | Absent                              |
| <b>36</b>       | High Fat       | Absent                              |
| <b>39</b>       | High Fat       | Absent                              |
| <b>40</b>       | High Fat       | Absent                              |
| <b>5</b>        | High Fat/2'-FL | Present                             |
| <b>15</b>       | High Fat/2'-FL | Present                             |
| <b>22</b>       | High Fat/2'-FL | Present                             |
| <b>28</b>       | High Fat/2'-FL | Present                             |
| <b>37</b>       | High Fat/2'-FL | Present                             |
| <b>38</b>       | High Fat/2'-FL | Present                             |

2'-FL, 2-fucosyllactose
